# Supplementary material
Source: PubMed Central journal article supplement (PMC5805922)

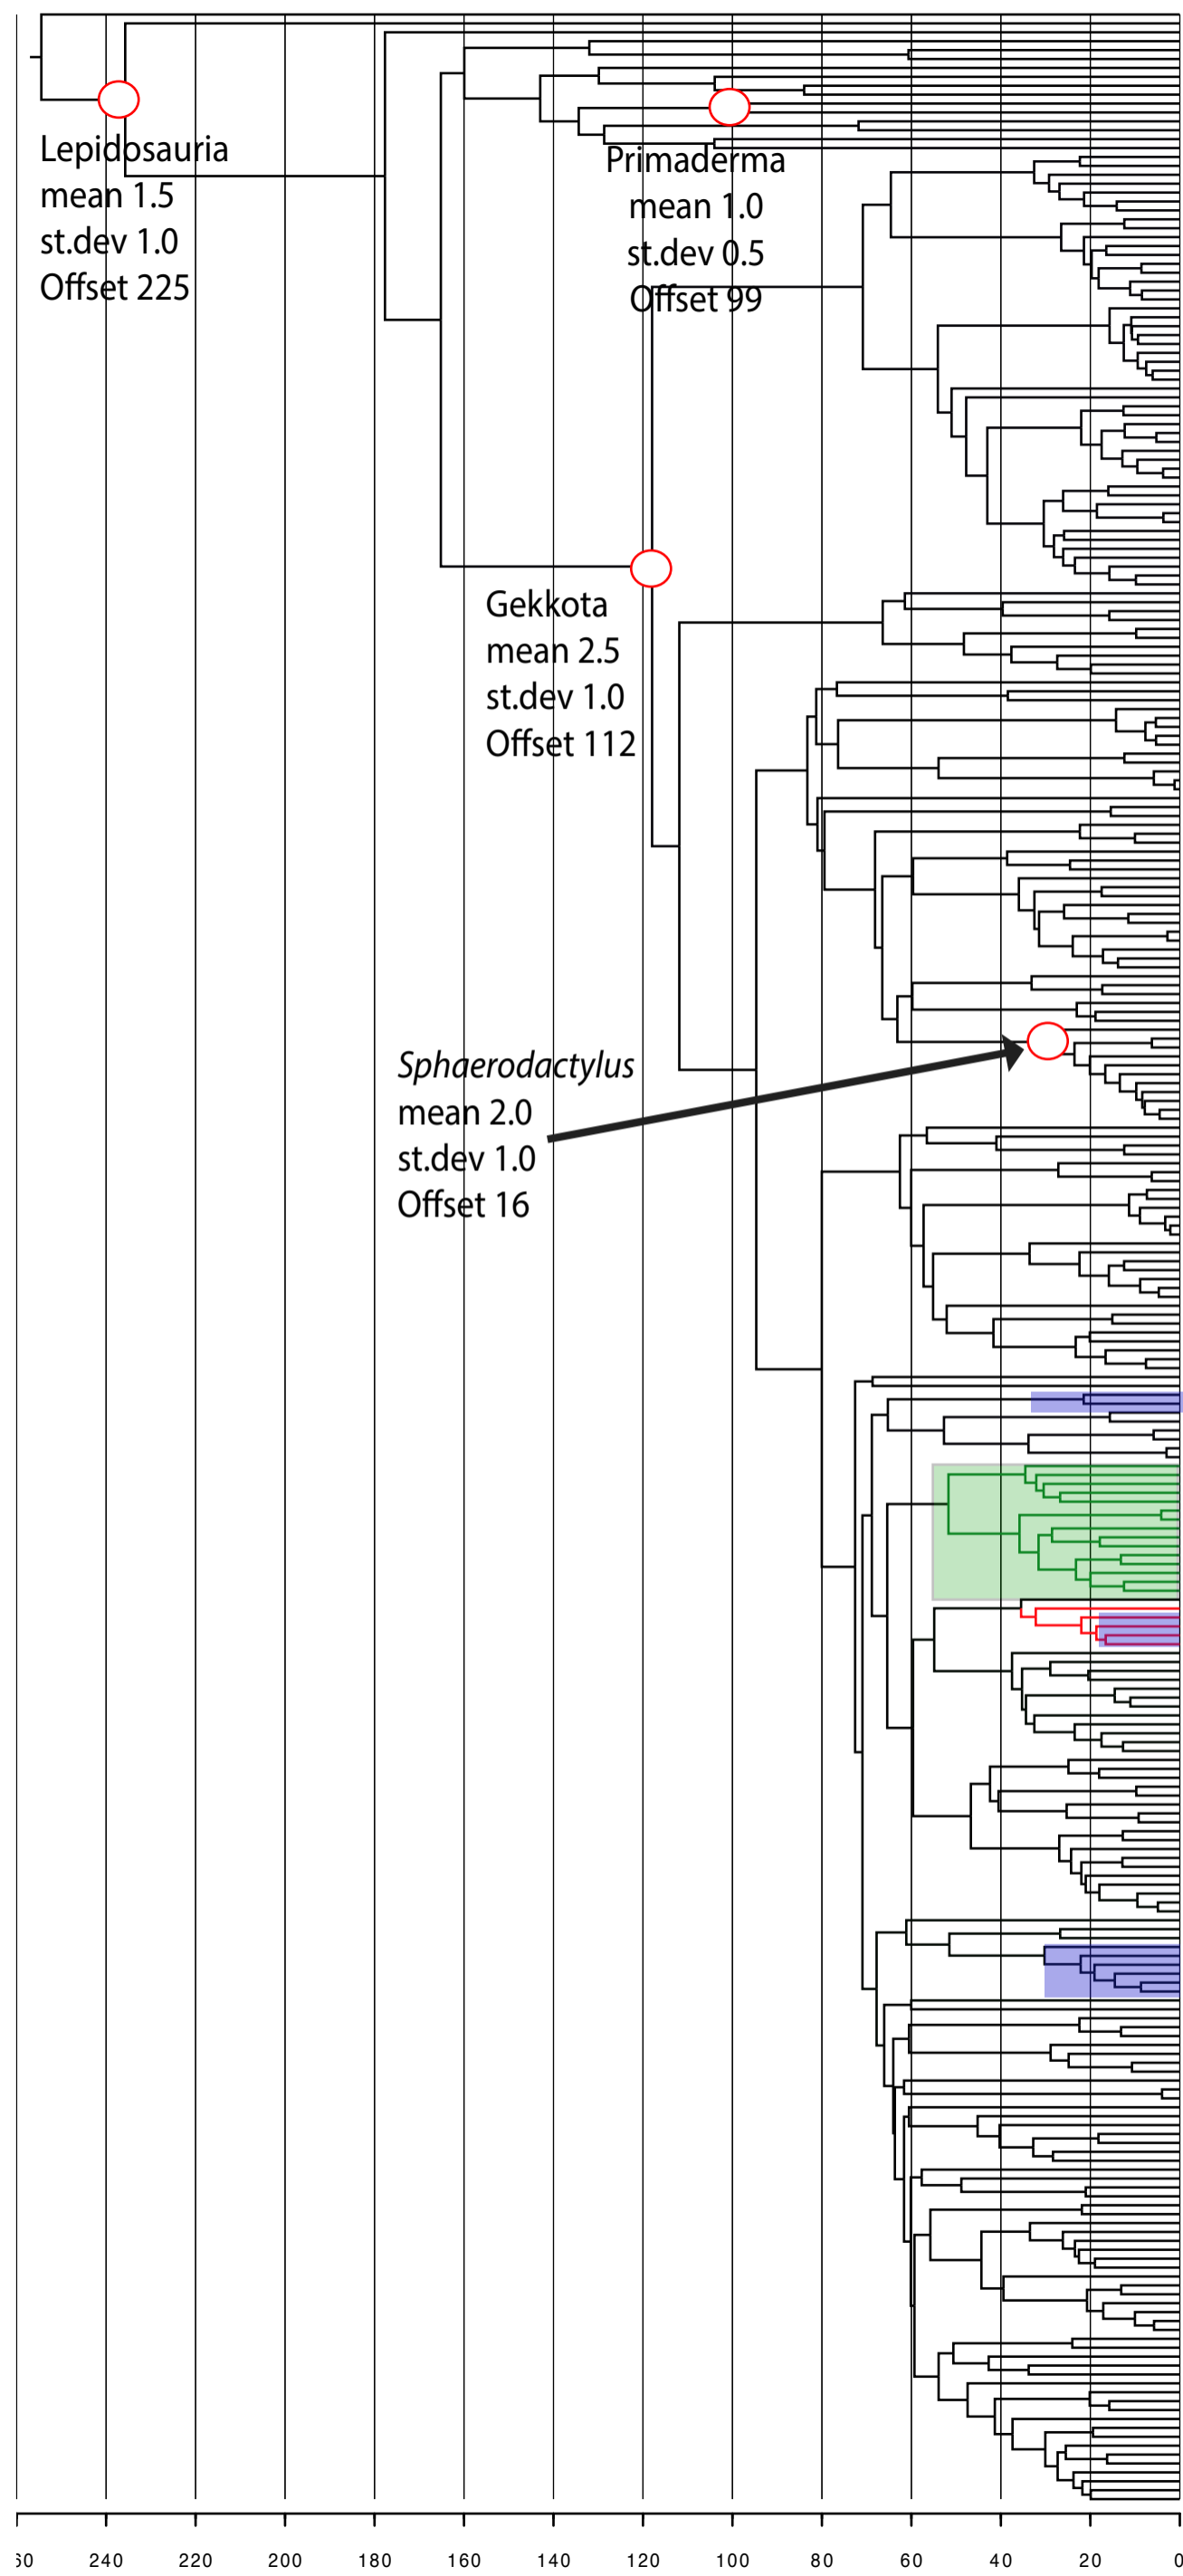

○ primary fossil calibrations

● nodes used as secondary calibrations for combined data analyses

### *Lepidodactylus*

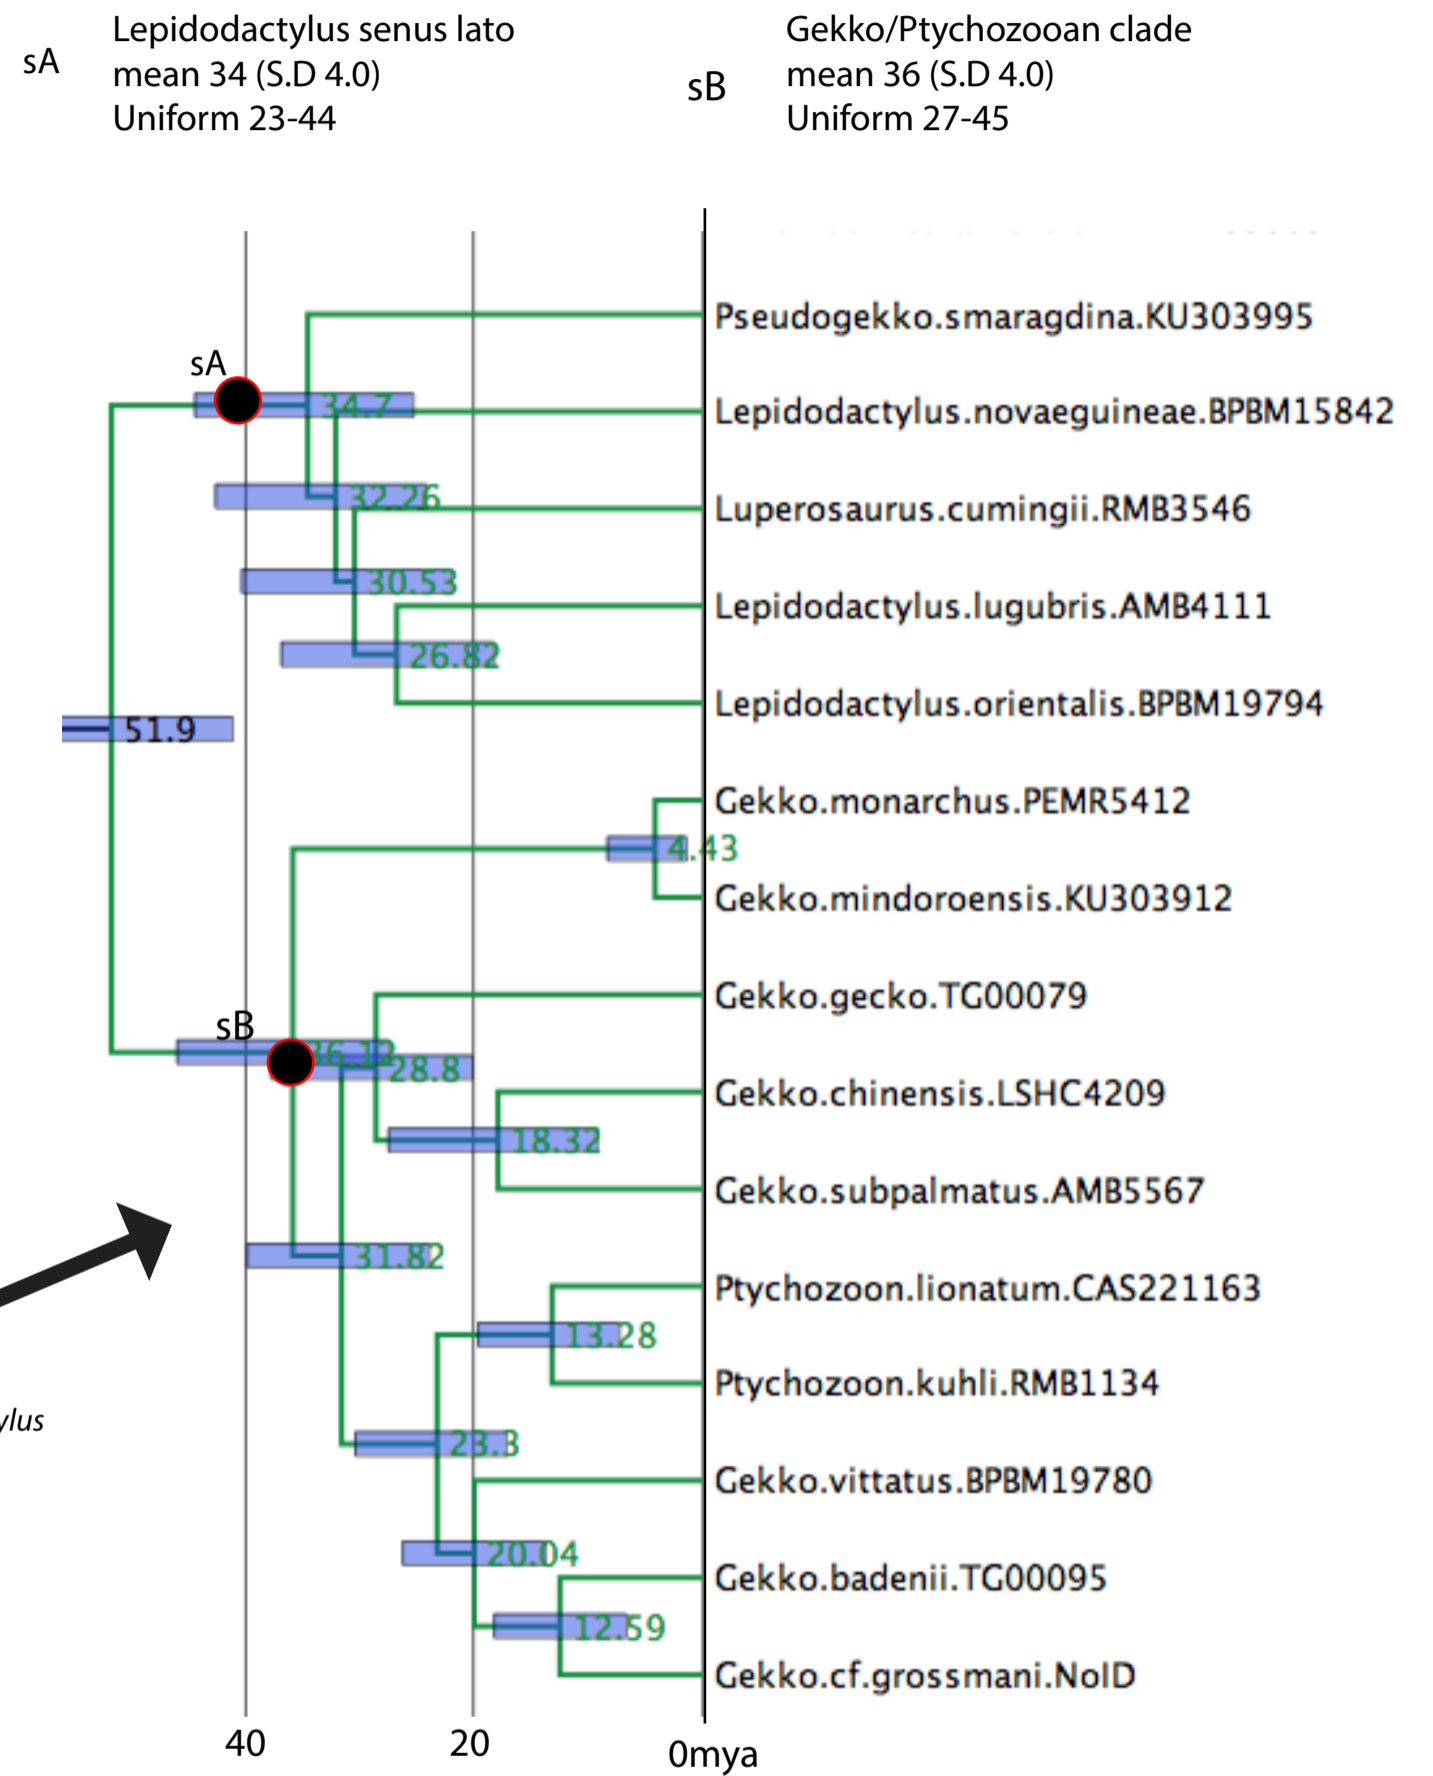

Supplement: rspb20171760supp4.pdf [file rspb20171760supp4.pdf]
