# Supplementary material
Source: PubMed Central journal article supplement (PMC5805922)

**A**

- Open vegetation
- Lower Montane
- Coastal forest
- Lowland Rainforest

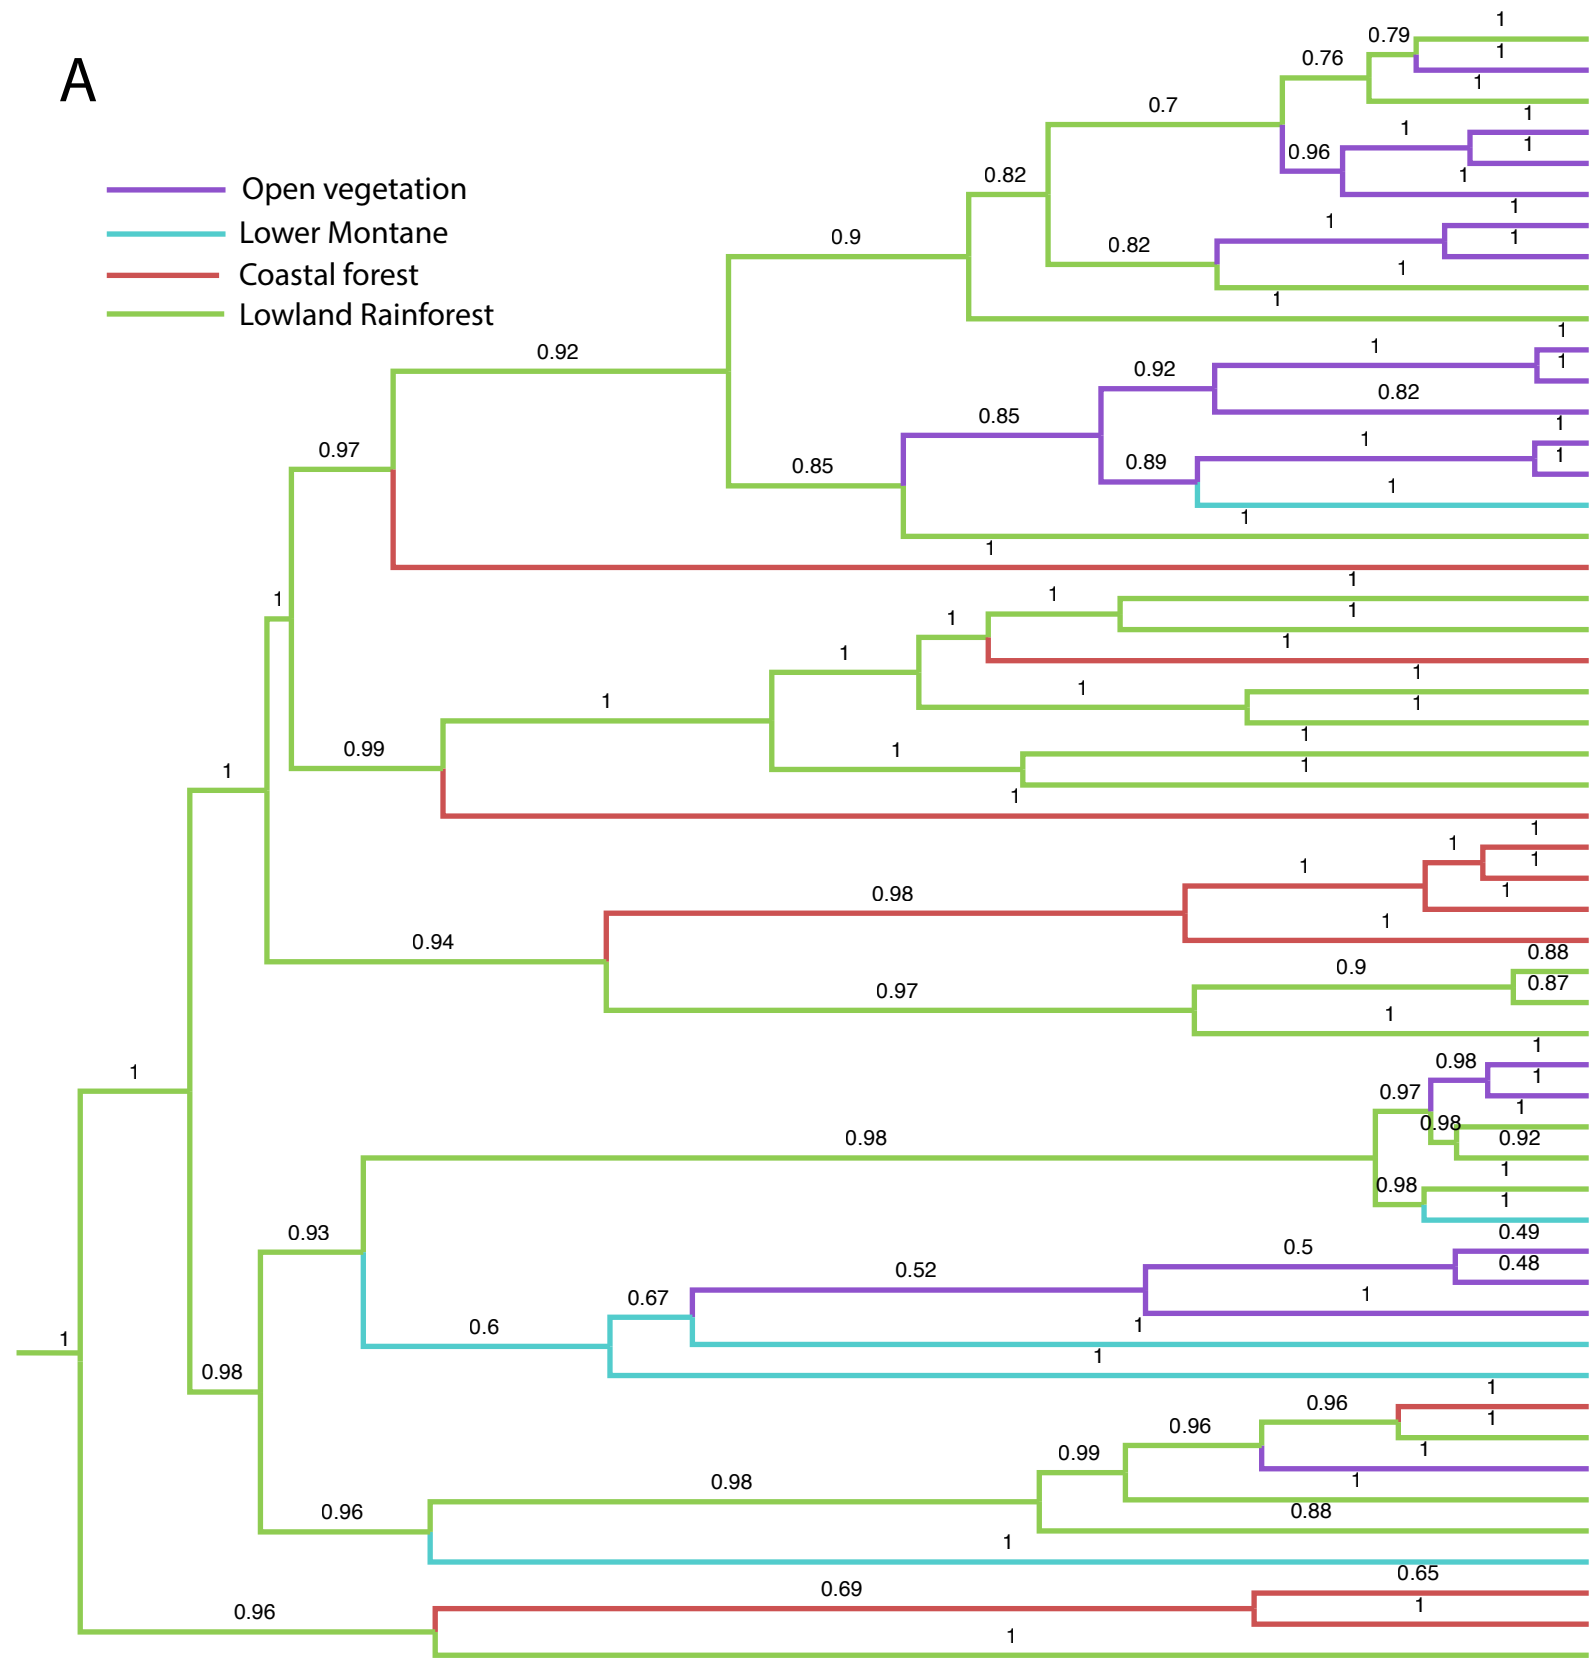

**B**

- Core (lowland rainforest)
- Marginal (other habitats)

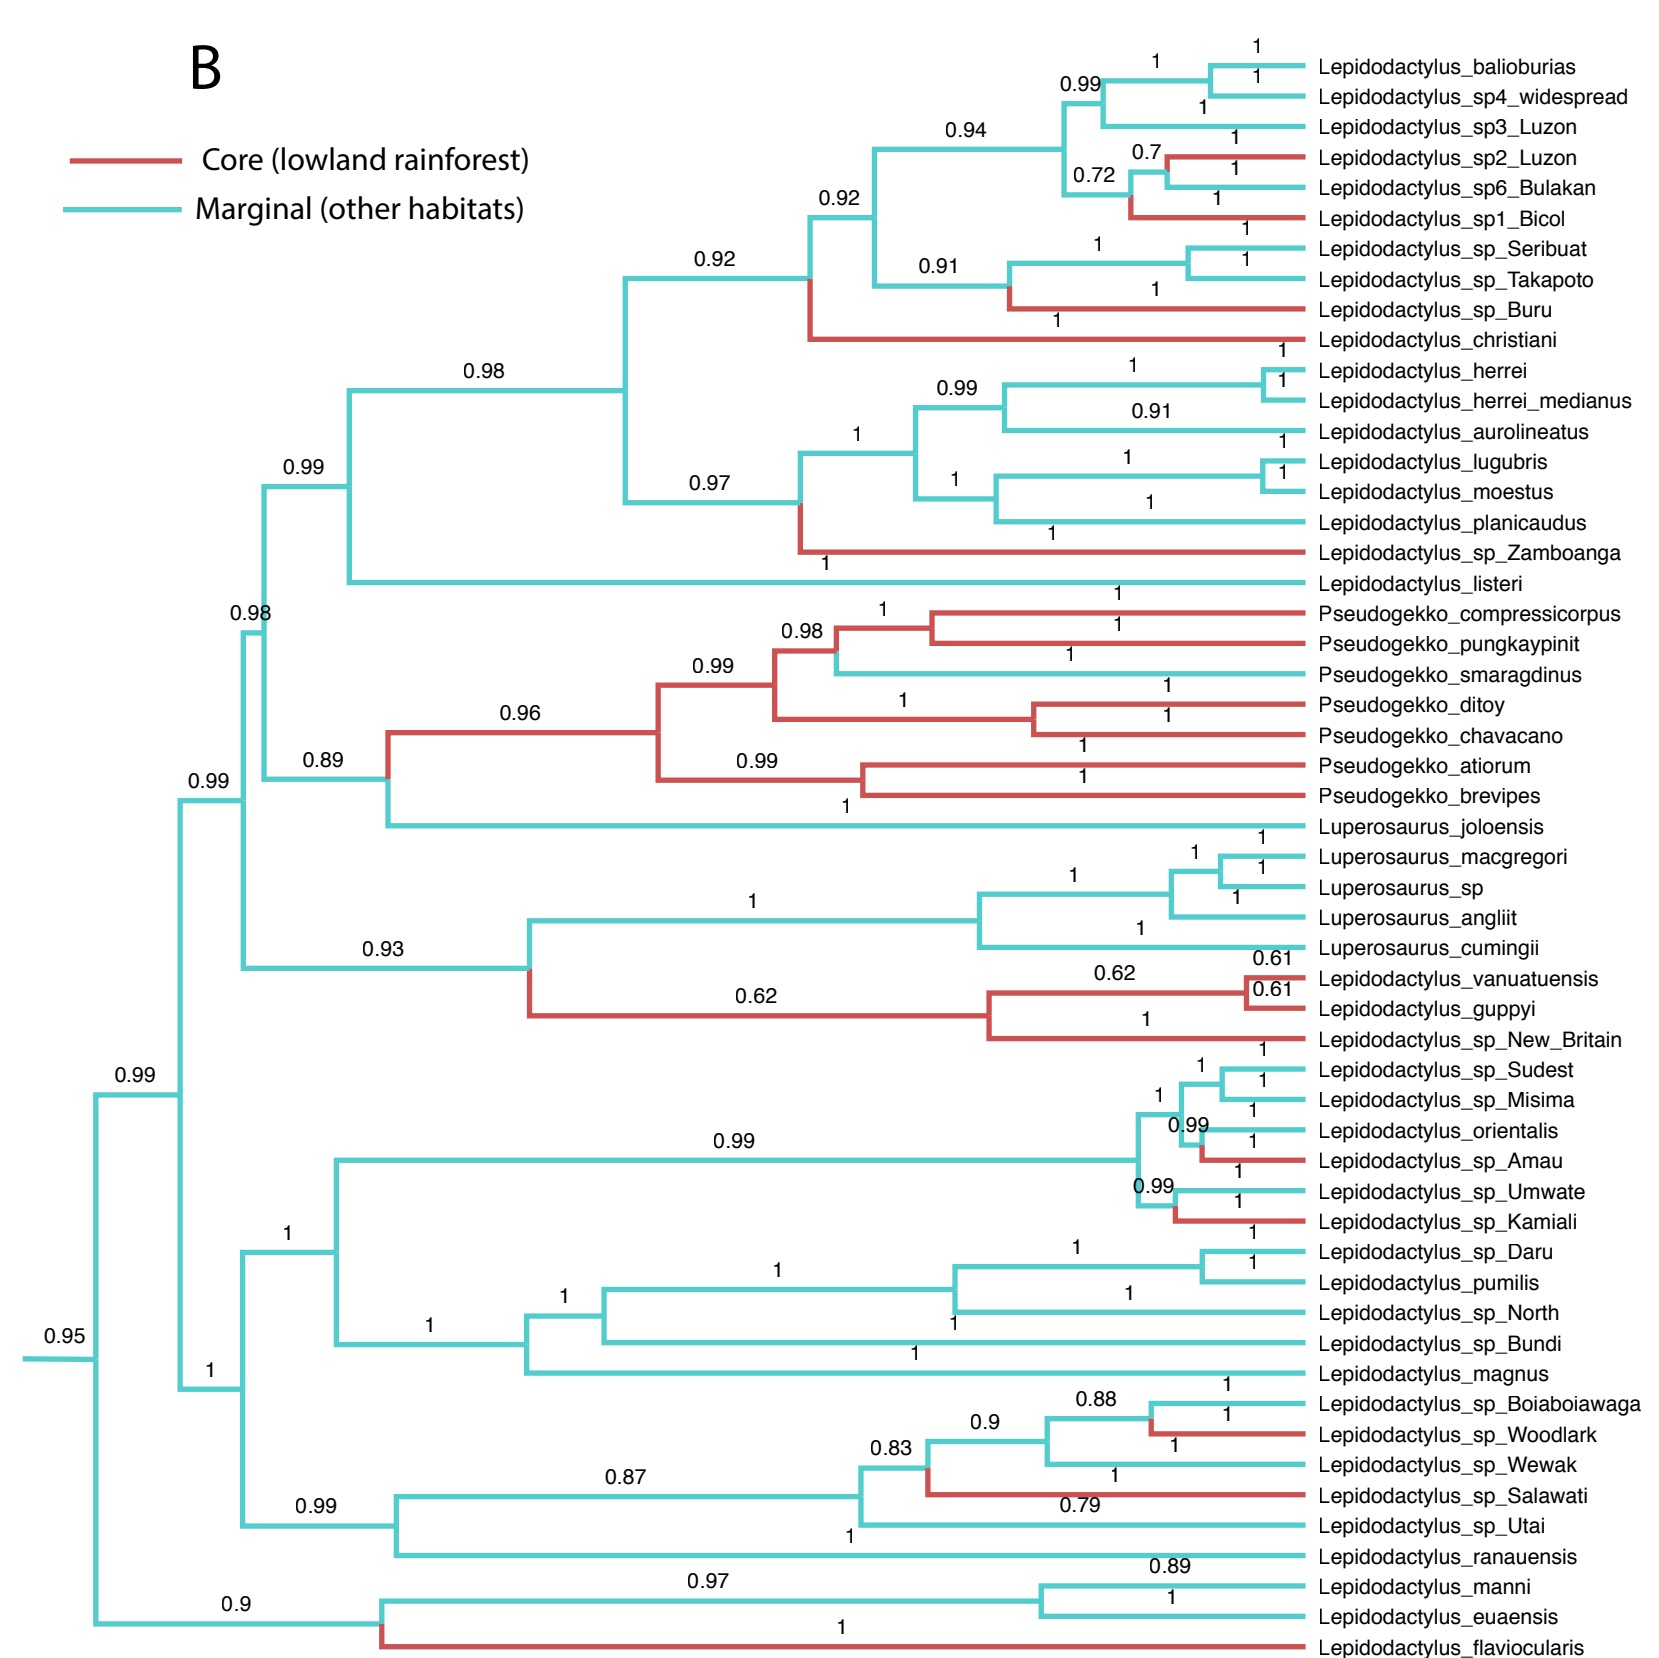

Supplement: rspb20171760supp7.pdf [file rspb20171760supp7.pdf]
