# Supplementary material
Source: PubMed Central journal article supplement (PMC5805922)

# A – EPCT coded as ‘Arc’

## Continent Marginal

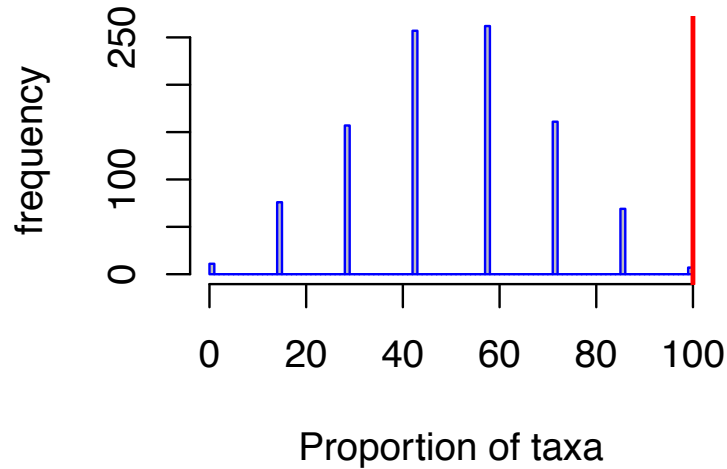

## Arc Marginal

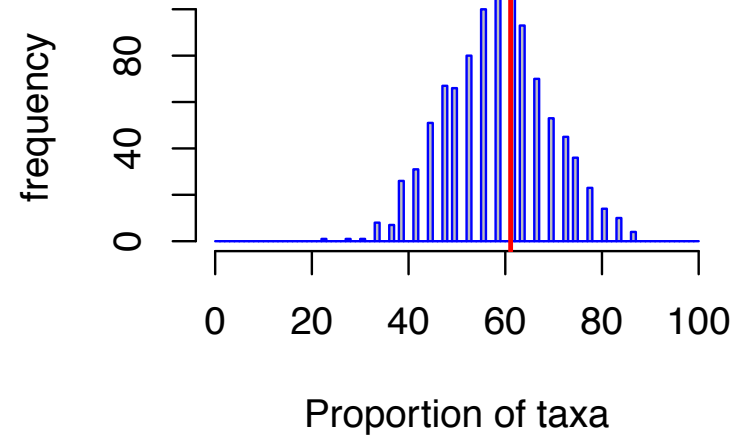

# B – EPCT coded as ‘Continental’

## Continent Marginal

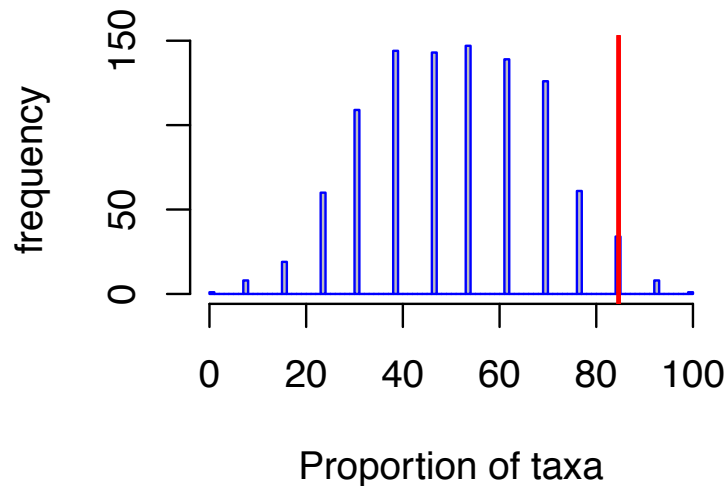

## Arc Marginal

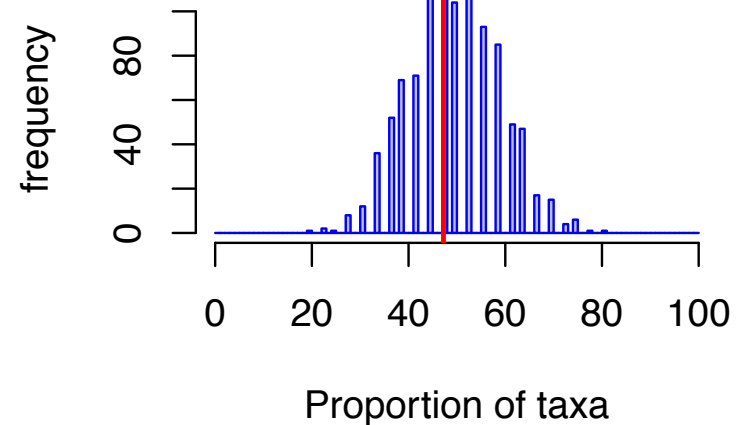

Supplement: rspb20171760supp8.pdf [file rspb20171760supp8.pdf]
