# Supplementary material
Source: PubMed Central journal article supplement (PMC5805922)

*Lepidodactylus* s.l.

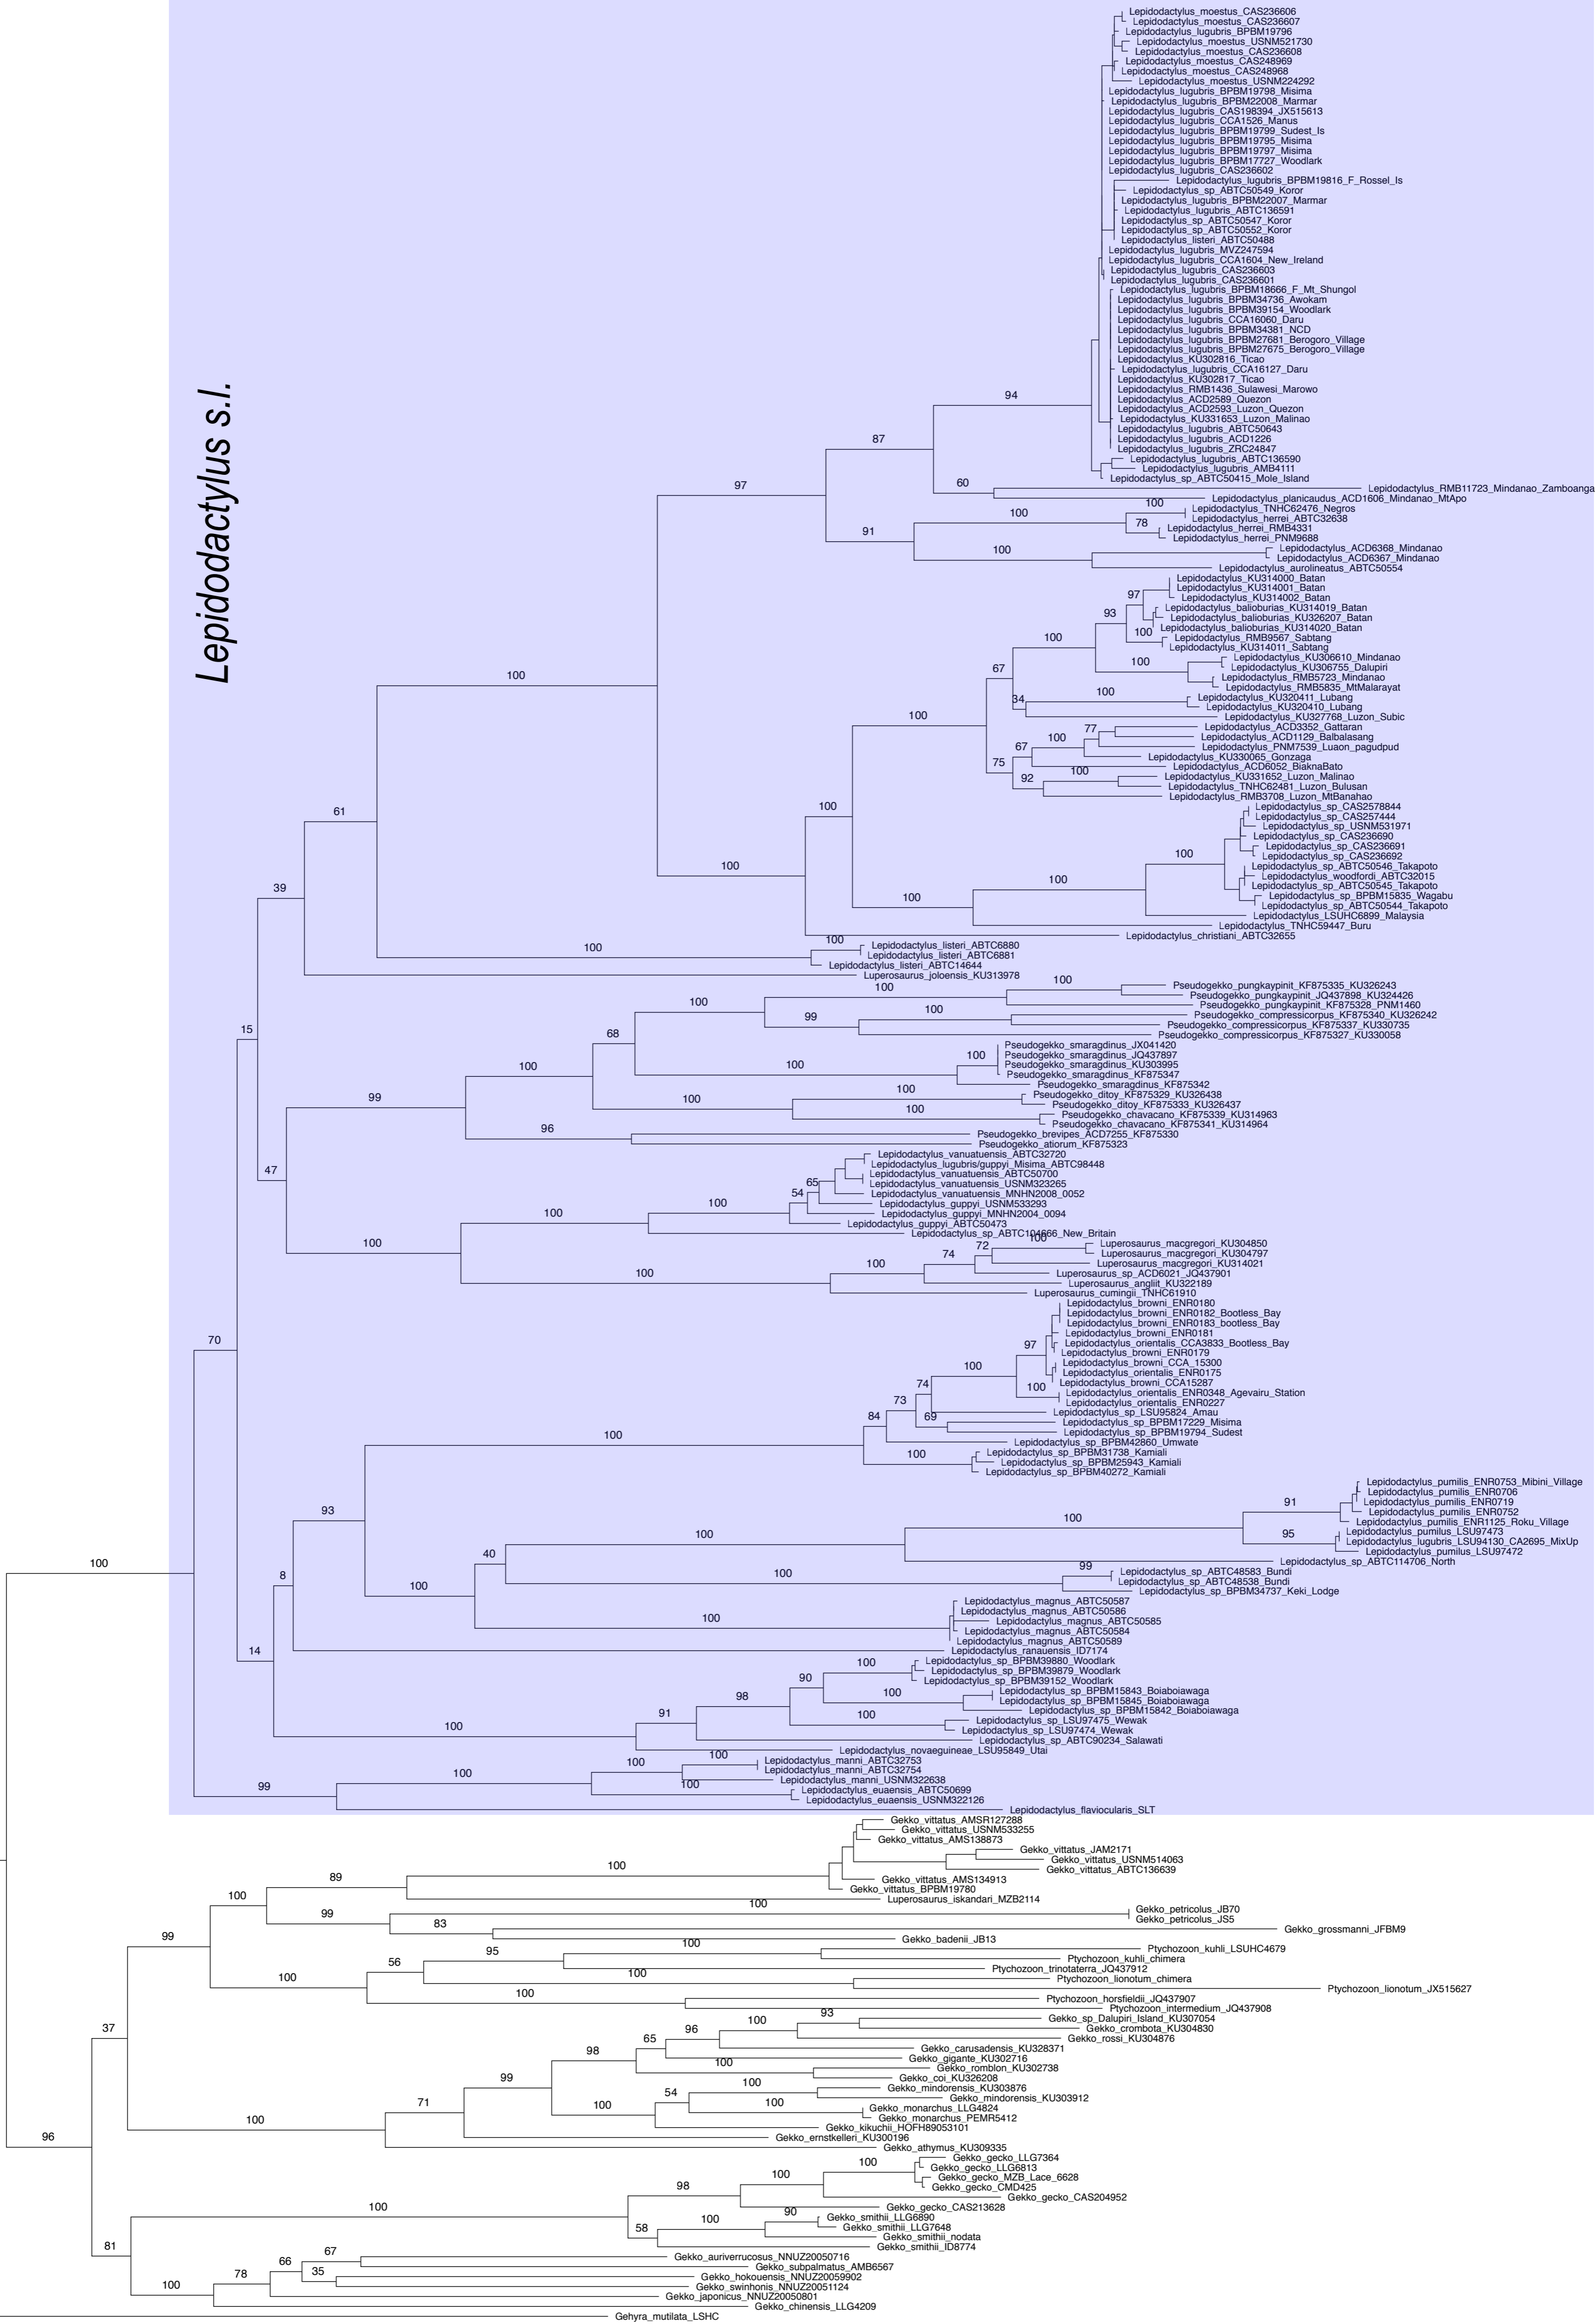

Supplement: rspb20171760supp3.pdf [file rspb20171760supp3.pdf]

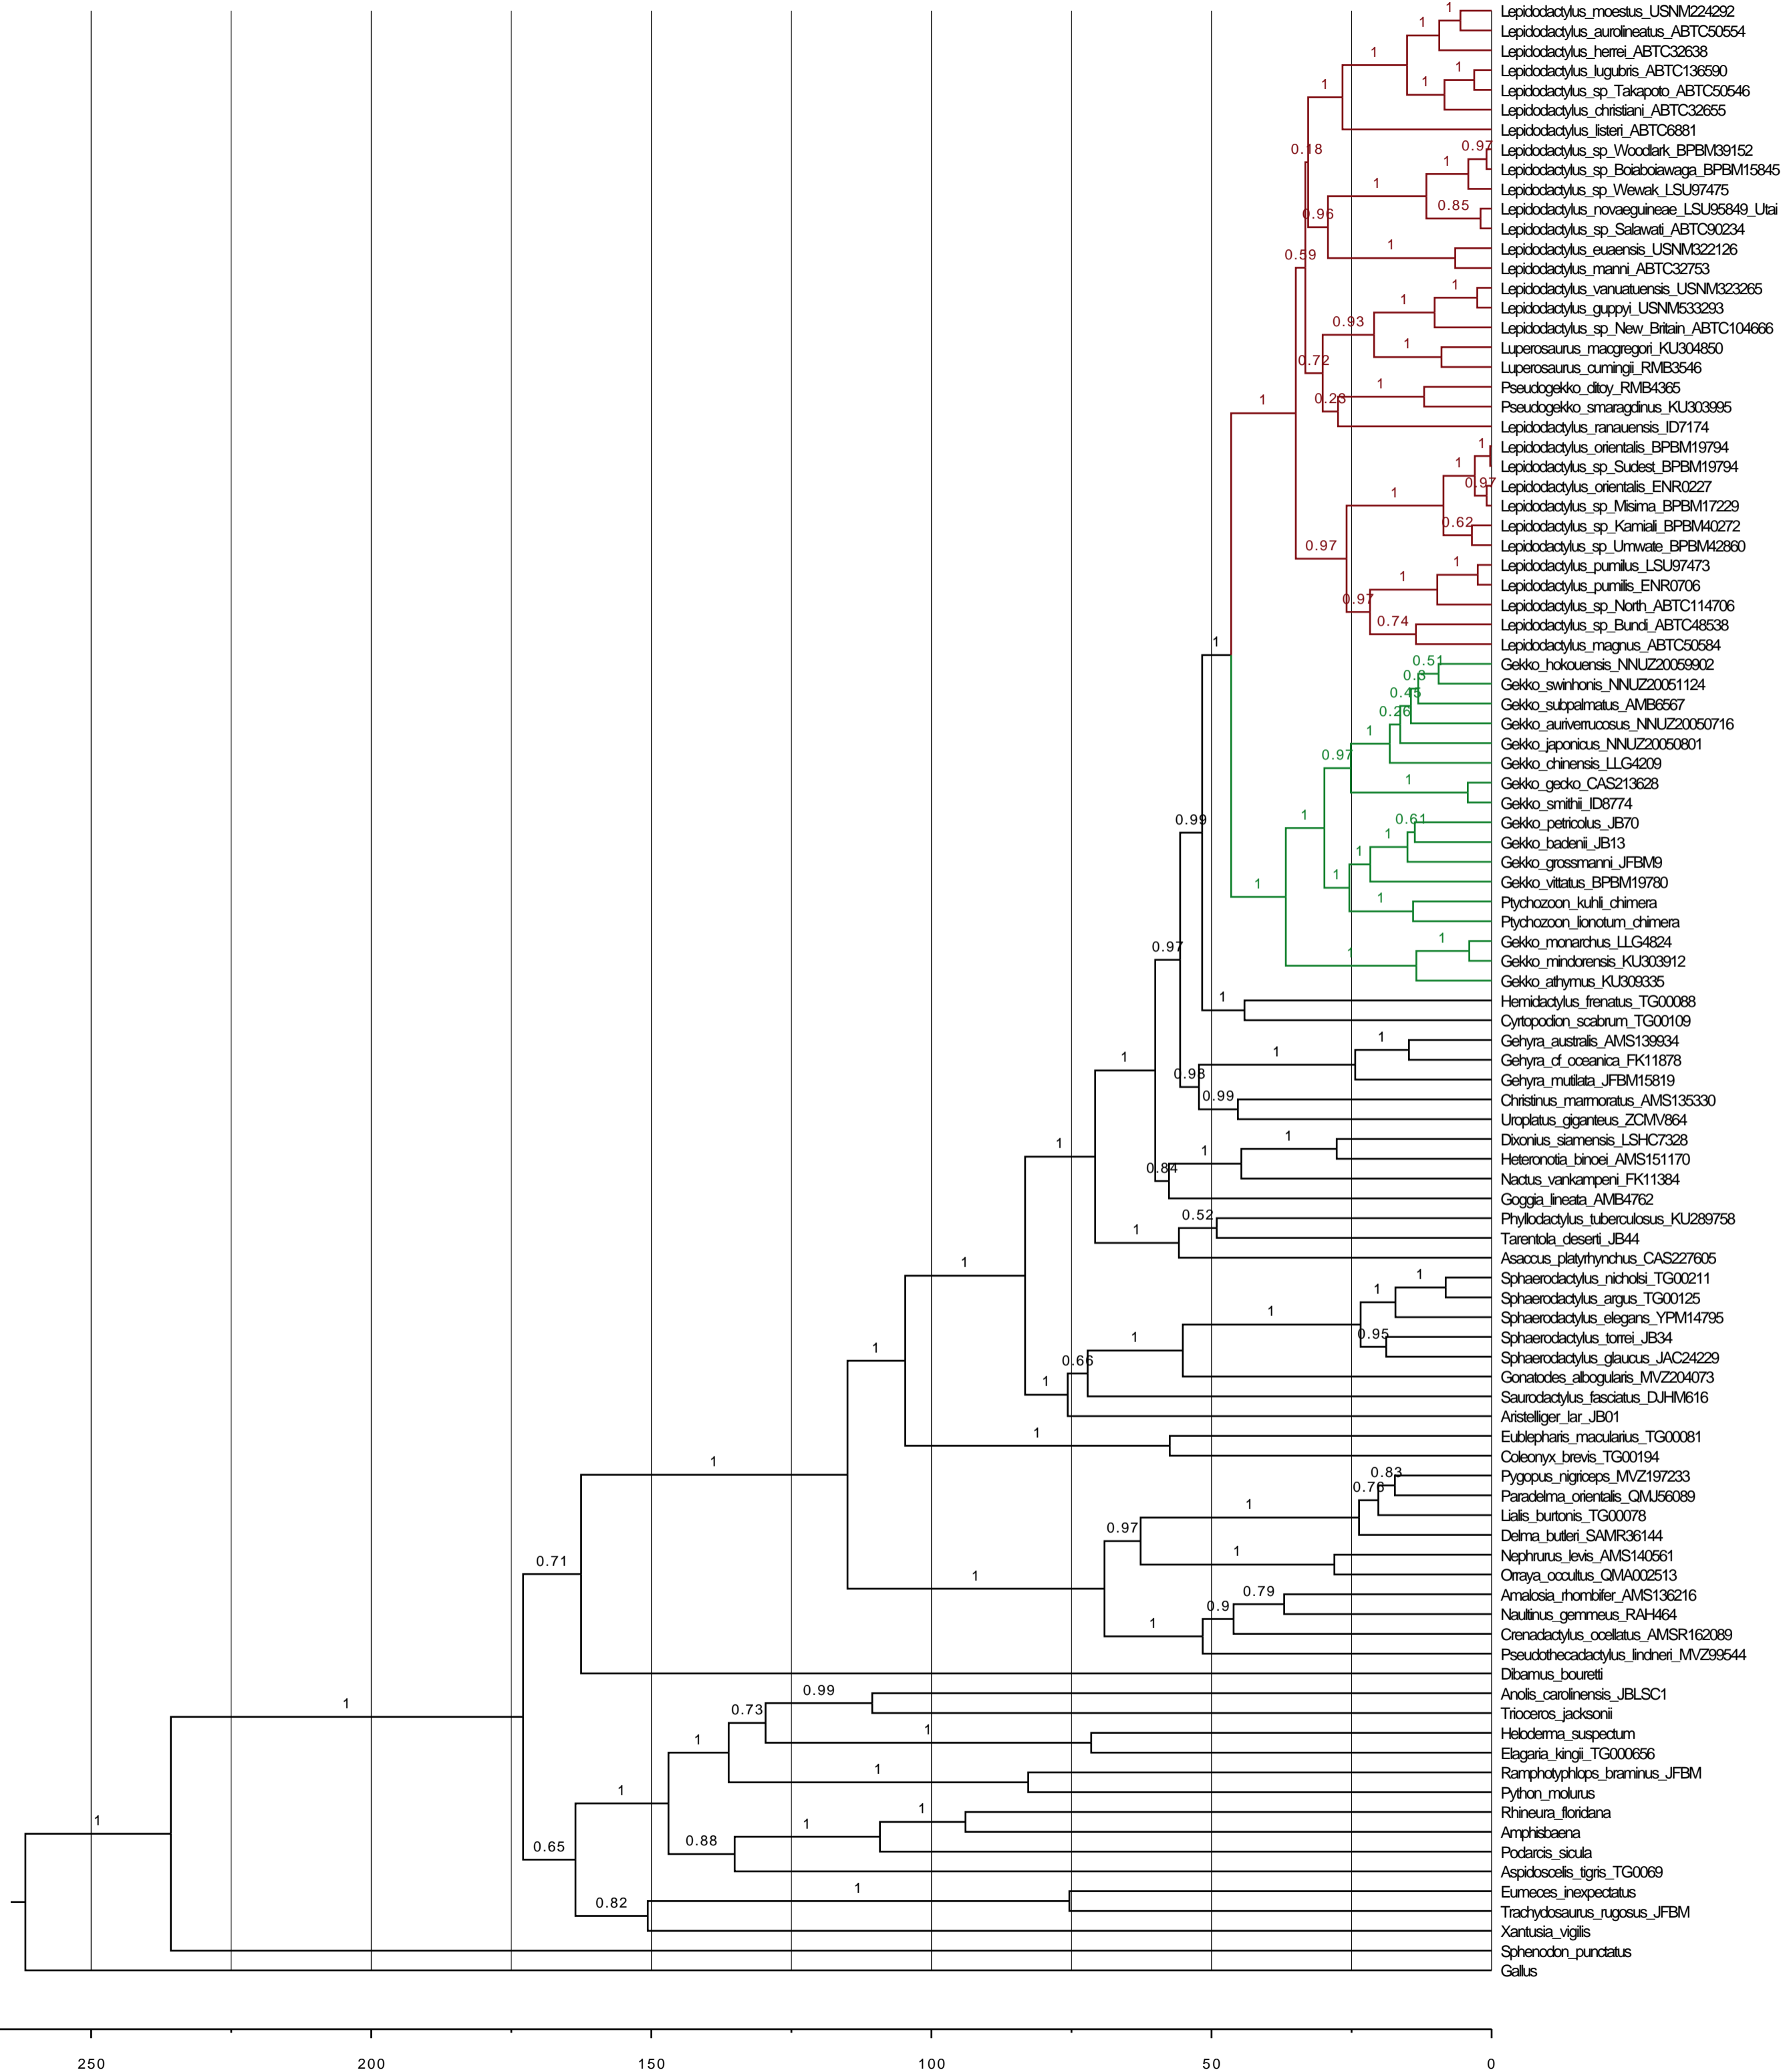

Supplement: rspb20171760supp5.pdf [file rspb20171760supp5.pdf]
